# Supplementary material for: Examination of the Virome of Taro Plants Affected by a Lethal Disease, the Alomae-Bobone Virus Complex, in Papua New Guinea
Source: MDPI journal article supplement (doi:10.3390/v14071410), 2022-06-28
Supplement: s1 [file s1]

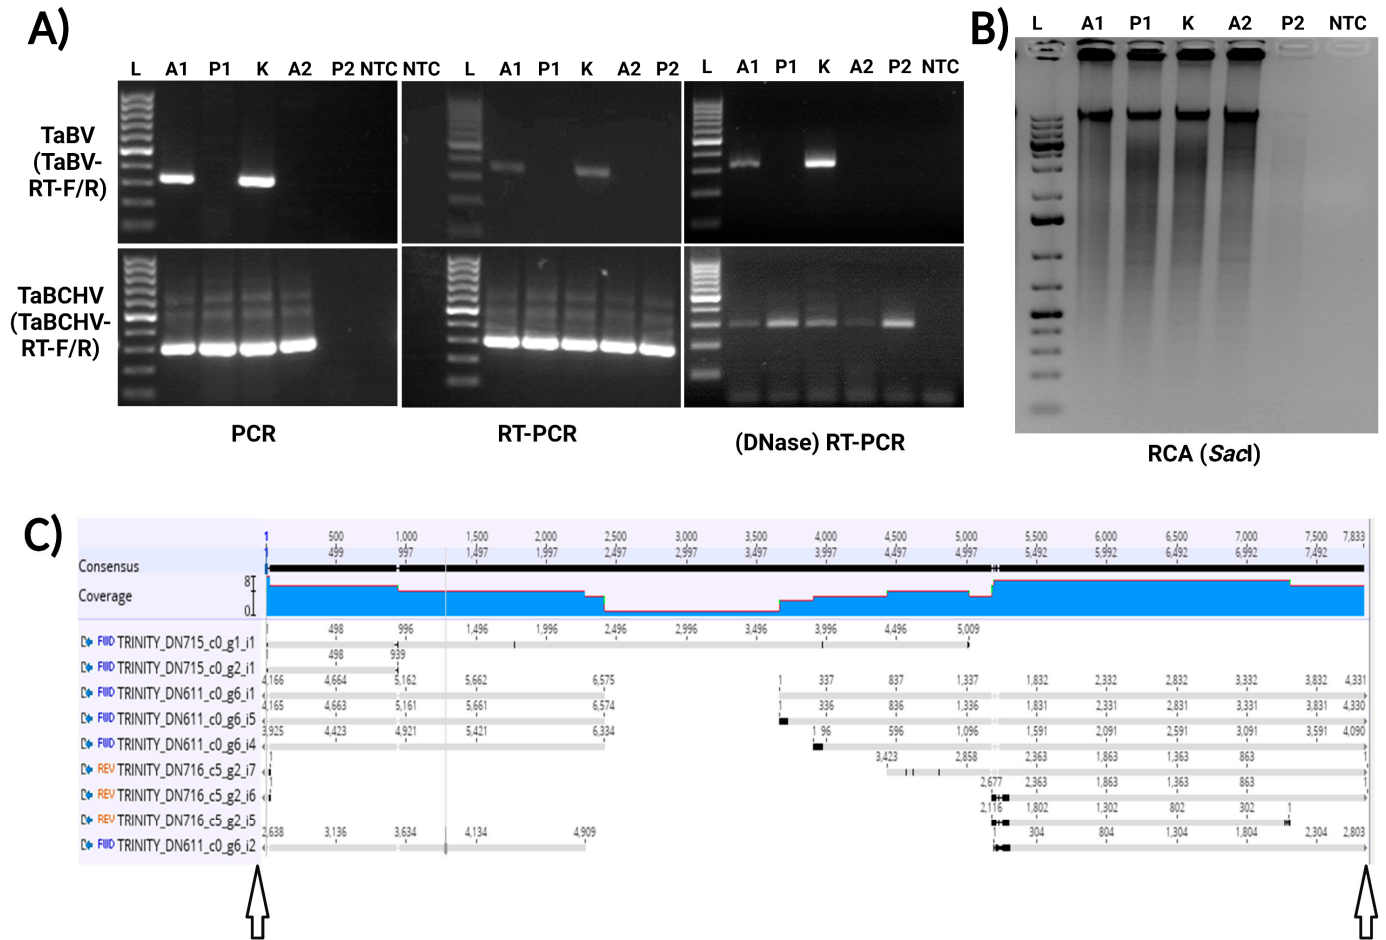

**Figure S1.** In vitro and in silico assays that demonstrate episomal badnavirus, TaBV and TaBCHV, presence in the taro samples collected from Papua New Guinea (PNG). L = ladder. A1 = asymptomatic sample 1 from Girua. A2 = asymptomatic sample 2 from Girua. P1 = ABVC-symptomatic sample 1 from Popondetta. P2 = ABVC-symptomatic sample 2 from Popondetta. K = ABVC-symptomatic sample from Kokoda. (A) Comparison of the results obtained on PCR, RT-PCR, and DNase-RT-PCR assays using TaBV- and TaBCHV-specific primers. (B) *SacI* digestion of RCA amplicons from the five PNG samples. (C) Mapping representation of the contigs used to obtain a circular scaffold sequence of TaBV by an iterative mapping approach. Arrows point to the continuity of the contigs beyond the linearized circular sequence of TaBV.

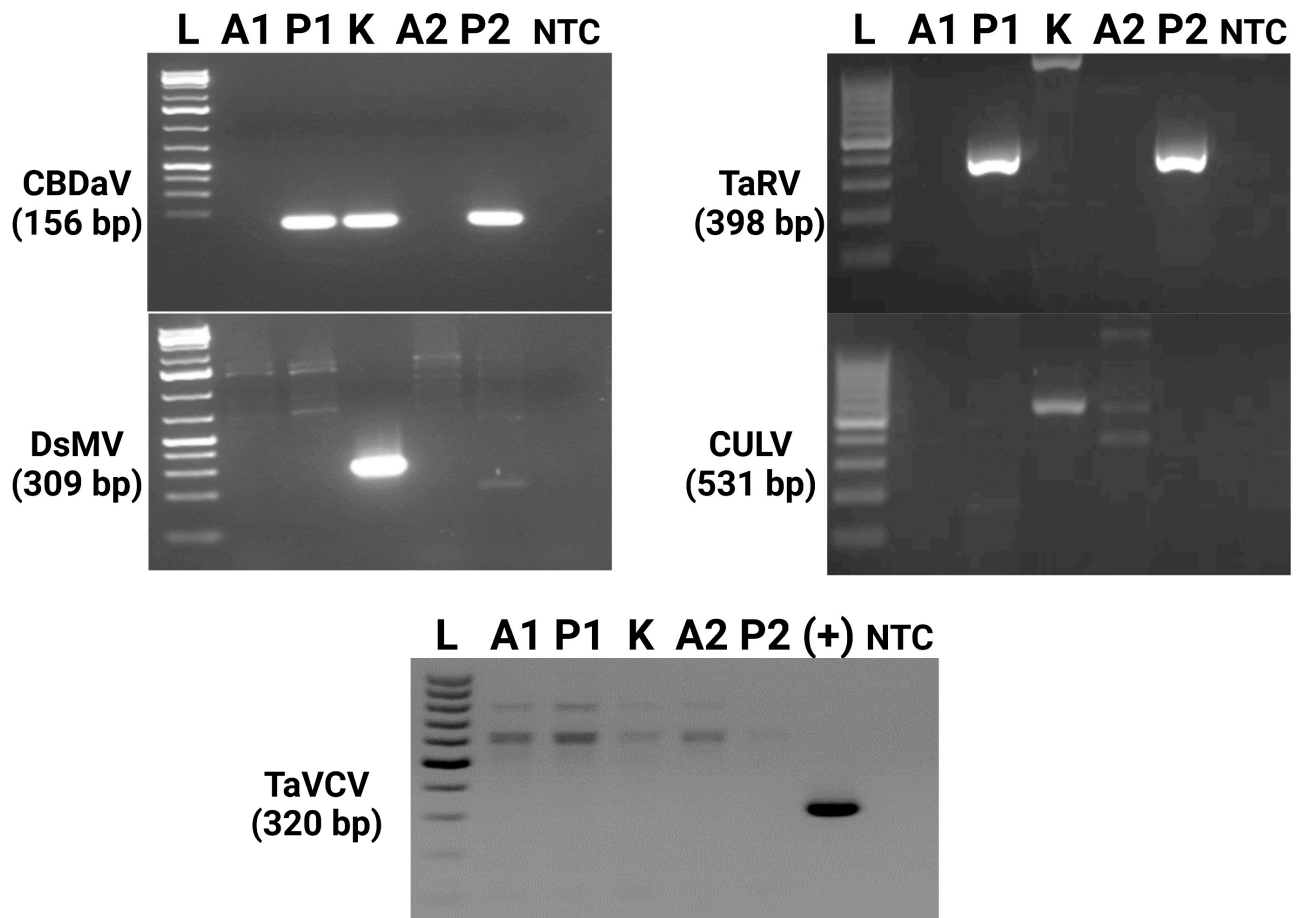

**Figure S2.** Agarose gel electrophoresis of the RT-PCR products used to determine virus presence in the ABVC-symptomatic samples (K, P1 and P2) and samples not presenting ABVC-related symptoms (A1 and A2). Amplicons were amplified using the virus-specific primers detailed in Table S1. Amplicons of RT-PCR assays for TaBV and TaBCHV are present in Figure S1. L = ladder. A1 = asymptomatic sample 1 from Girua. A2 = asymptomatic sample 2 from Girua. P1 = ABVC-symptomatic sample 1 from Popondetta. P2 = ABVC-symptomatic sample 2 from Popondetta. K = ABVC-symptomatic sample from Kokoda.
